# Supplementary material for: Uniform Bi–Bi2O3 nanoparticles/reduced graphene oxide composites for high-performance aqueous alkaline batteries
Source: Royal Society of Chemistry journal article supplement (doi:10.1039/d2dt01217k), 2022-01-01
Supplement: d2dt01217k1.pdf [file d2dt01217k1.pdf]

**Uniform Bi-Bi<sub>2</sub>O<sub>3</sub> nanoparticles/reduced graphene oxide composites for high-performance  
aqueous alkaline battery**

Mangmang Shi<sup>a</sup>, Mingshu Zhao<sup>\*a</sup>, Qingyang Zheng<sup>b</sup>, Lidong Jiao<sup>a</sup>, Zhou Su<sup>a</sup>, Min Li<sup>a</sup>, Xiaobo zhao<sup>c</sup>,  
Xiaoping Song<sup>a</sup>, and Sen Yang

a. School of Physics, MOE key Laboratory for Non-Equilibrium Synthesis and Modulation of Condensed  
Matter, Key Laboratory of Shaanxi for Advanced Functional Materials and Mesoscopic Physics, State  
Key Laboratory for Mechanical Behavior of Materials, Xi'an Jiaotong University, Xi'an 710049, China.

b. Xi'an High-tech Research Institute, 710025 Xi'an, China.

c. Xi'an Fiber Textile Supervision and Inspection Institute, Xi'an 710068, China.

---

\*Corresponding authors: E-mail: [zhaomshu@xjtu.edu.cn](mailto:zhaomshu@xjtu.edu.cn);

Tel: +86-13186193932

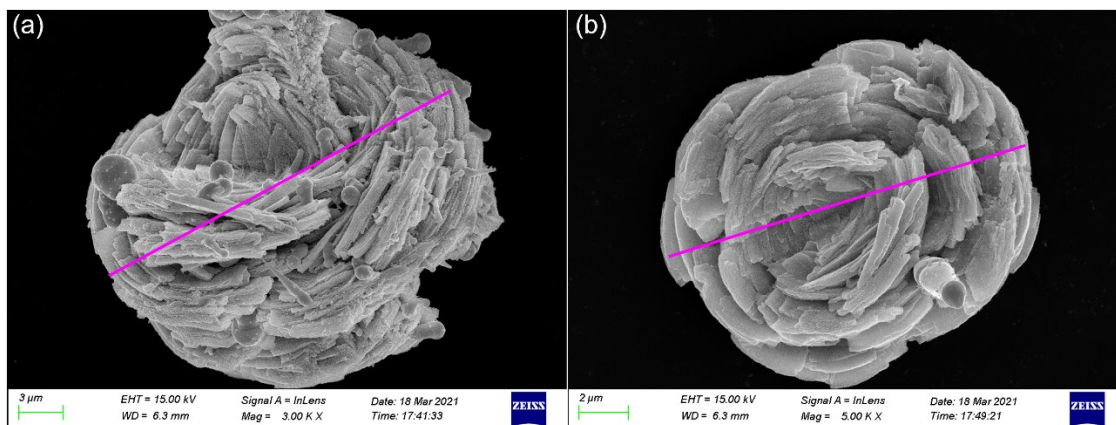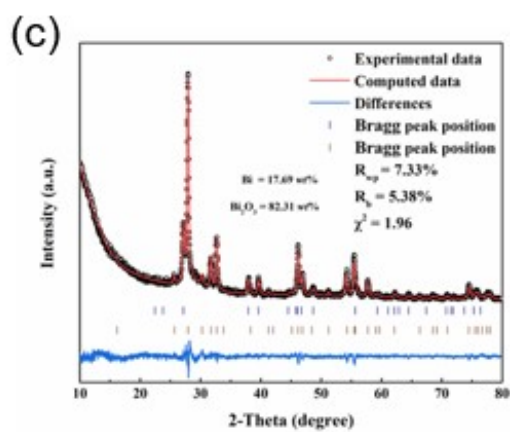

Fig. S1. (a, b) Low-magnification SEM images of Bi-Bi<sub>2</sub>O<sub>3</sub> and (c) the Rietveld refinements on the XRD pattern of the Bi-Bi<sub>2</sub>O<sub>3</sub>/rGO composites.

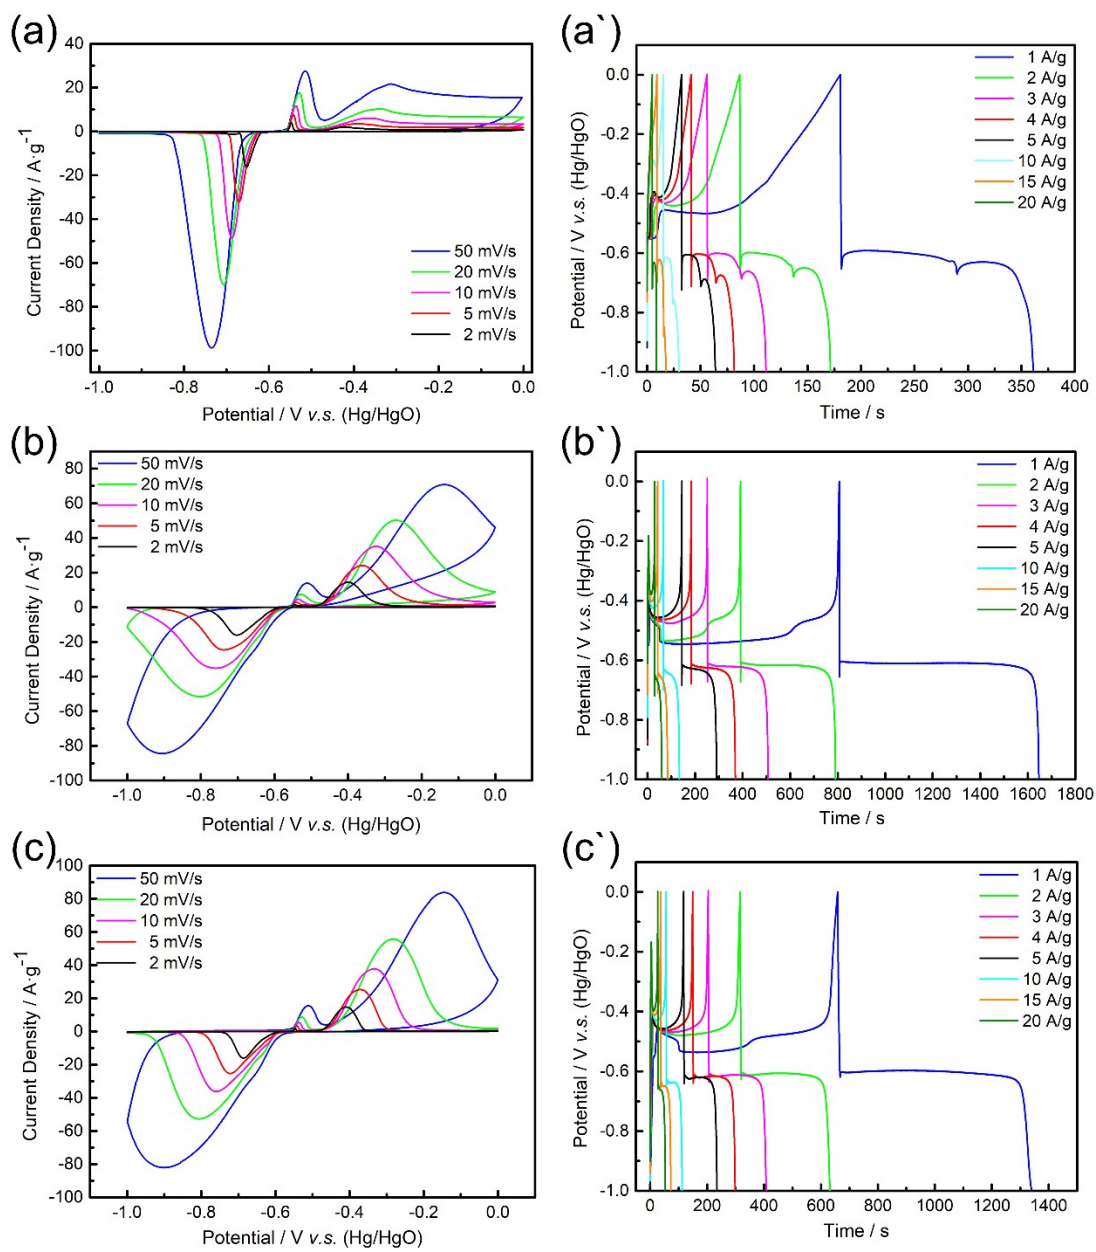

Fig. S2. (a-c) CV curves at different scan rates and (a'-c') the corresponding GCD curves at various current densities of Bi-precursor, Bi-Bi<sub>2</sub>O<sub>3</sub> and Bi-Bi<sub>2</sub>O<sub>3</sub>/rGO-60.

Table S1. The parameter information of the as-obtained electrosynthesis samples.

| Sample                               | Co(NO <sub>3</sub> ) <sub>2</sub> • 6H <sub>2</sub> O<br>(mmol) | Ni(NO <sub>3</sub> ) <sub>2</sub> • 6H <sub>2</sub> O<br>(mmol) | Chronopotentiometry  |
|--------------------------------------|-----------------------------------------------------------------|-----------------------------------------------------------------|----------------------|
| Ni(OH) <sub>2</sub>                  | None                                                            | 6                                                               |                      |
| Ni <sub>2</sub> Co <sub>1</sub> -LDH | 4                                                               | 2                                                               |                      |
| NiCo-LDH                             | 3                                                               | 3                                                               | -1 V vs. Ag/AgCl for |
| Ni <sub>1</sub> Co <sub>2</sub> -LDH | 2                                                               | 4                                                               | 200 s                |
| Co(OH) <sub>2</sub>                  | 6                                                               | None                                                            |                      |

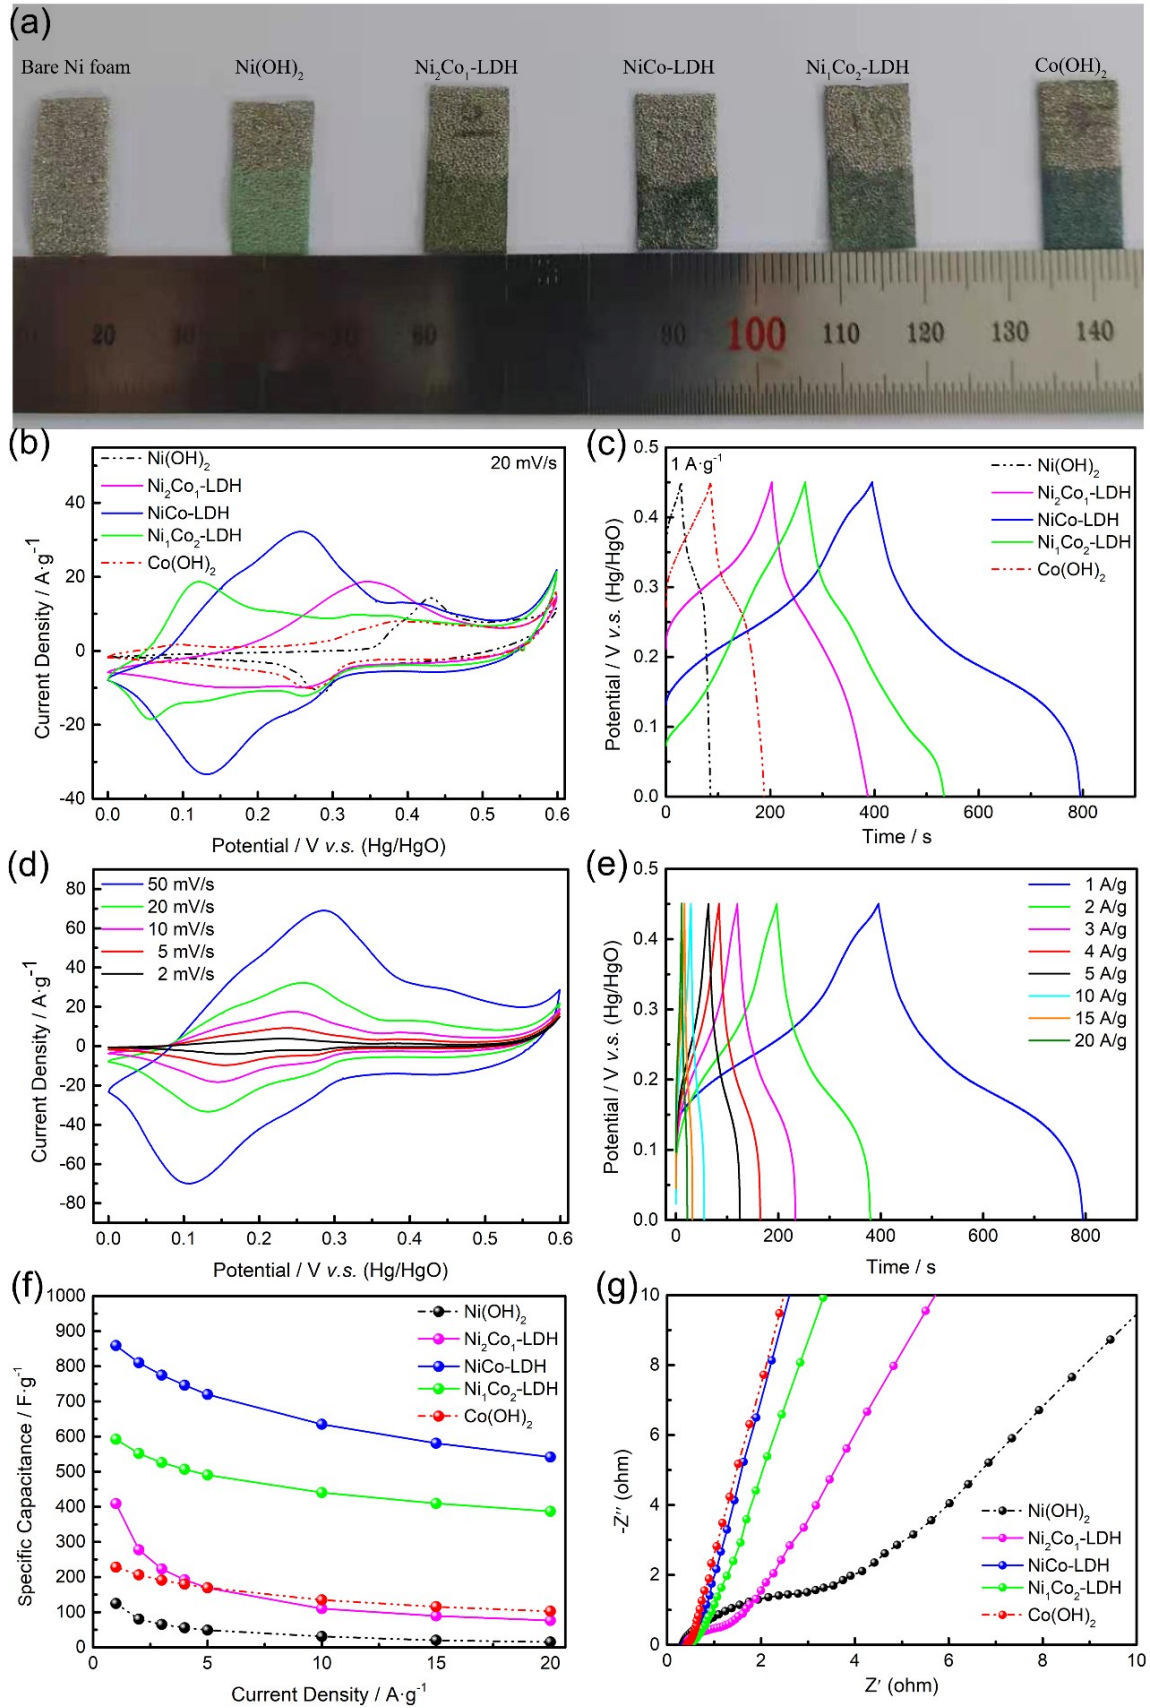

Fig. S3. Optical images and a comparison of the electrochemical performance of the Ni(OH)<sub>2</sub>, Ni<sub>2</sub>Co<sub>1</sub>-

LDH, NiCo-LDH, Ni<sub>1</sub>Co<sub>2</sub>-LDH and Co(OH)<sub>2</sub> electrodes in three-electrode system. (a) Optical images of the samples, (b) CV curves at a scan rate of 20 mV s<sup>-1</sup>, (c) GCD curves at a current density of 1 A g<sup>-1</sup>, (d, e) CV curves at various scan rate and GCD curves at different current densities of the NiCo-LDH electrode, (f) Specific capacitance at various current densities and (g) Nyquist plots of EIS.

Table S2. Impedance parameters simulated from the equivalent circuits.

| Sample                               | $R_s$ ( $\Omega$ ) | $R_{ct}$ ( $\Omega$ ) |
|--------------------------------------|--------------------|-----------------------|
| Ni(OH) <sub>2</sub>                  | 0.32               | 3.49                  |
| Ni <sub>2</sub> Co <sub>1</sub> -LDH | 0.39               | 0.35                  |
| NiCo-LDH                             | 0.37               | 0.09                  |
| Ni <sub>1</sub> Co <sub>2</sub> -LDH | 0.45               | 0.14                  |
| Co(OH) <sub>2</sub>                  | 0.35               | ---                   |

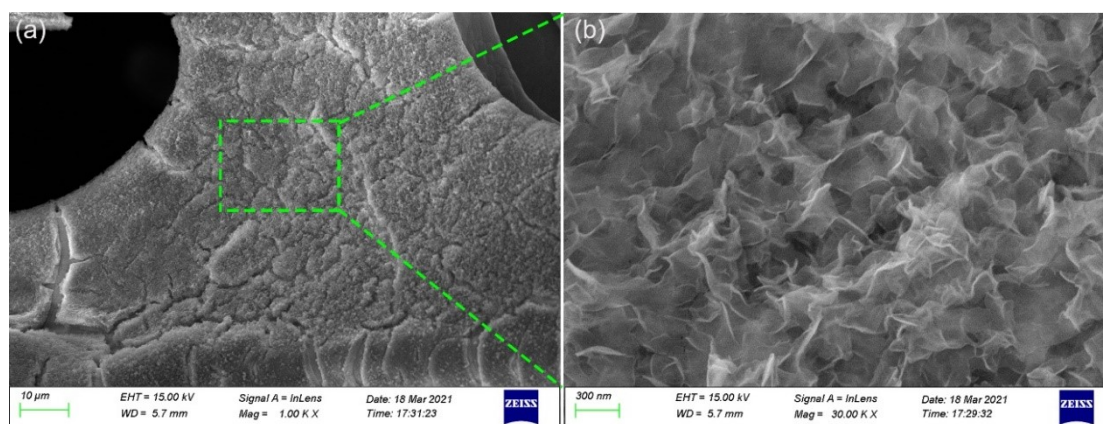

Fig. S4. Low and high-magnification SEM images of NiCo-LDH via an electrosynthesis method.



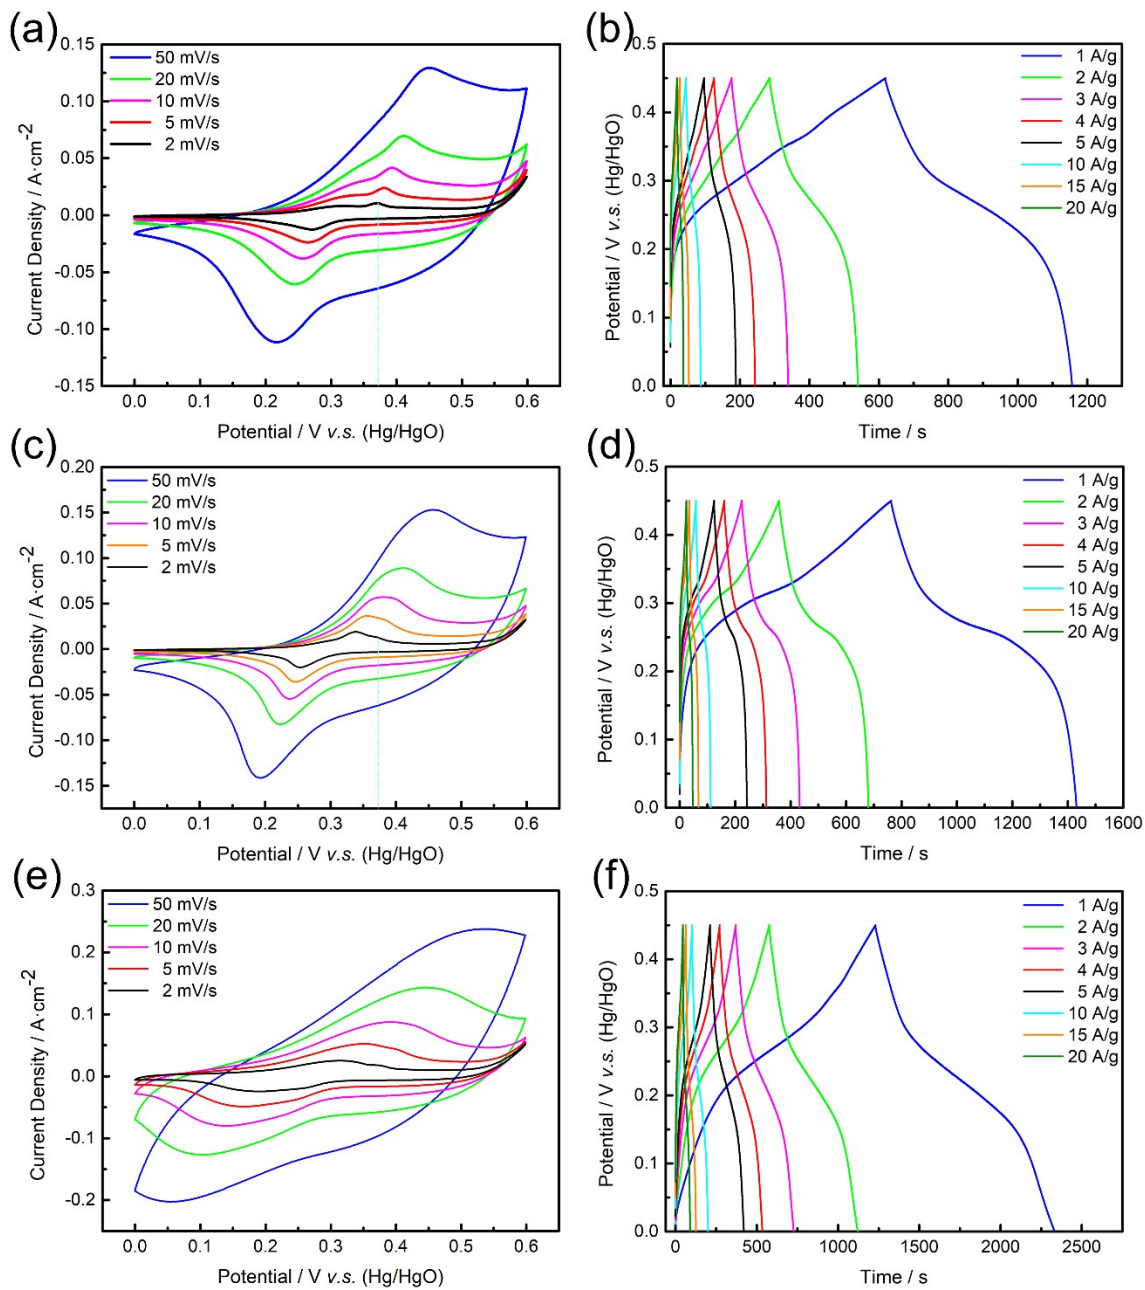

Fig. S5. CV curves at various scan rates and GCD curves at different current densities of (a, b)  $\text{CoS}_x$ , (c, d)  $\text{CoVS}_x$  and (e, f)  $\text{CoVS}_x@NiCo-LDH$ .

Table S3. A comparison of electrochemical performance with previously reported work.

| Material                                                      | Surface morphology         | Capacitance                                              | Current density        | Electrolyte                           | Ref.      |
|---------------------------------------------------------------|----------------------------|----------------------------------------------------------|------------------------|---------------------------------------|-----------|
| Bi <sub>2</sub> O <sub>3</sub> /rGO-20                        | Nanoparticles/Nanosheet    | 288.0 mAh g <sup>-1</sup><br>(1036.9 F g <sup>-1</sup> ) | 1 A g <sup>-1</sup>    | 6 M KOH                               | This work |
| HHP Bi <sub>2</sub> O <sub>3</sub>                            | Hollow hexagonal prism     | 327 mAh g <sup>-1</sup>                                  | 1 A g <sup>-1</sup>    | 6 M KOH                               | [1]       |
| Bi <sub>2</sub> O <sub>3</sub> Se/rGO                         | Nanosheet/Nanosheet        | 258.11 mAh g <sup>-1</sup>                               | 1 A g <sup>-1</sup>    | 1 M KOH                               | [2]       |
| Bi <sub>2</sub> O <sub>3</sub>                                | Nanowires                  | 691.3 F g <sup>-1</sup>                                  | 2 A g <sup>-1</sup>    | 6 M KOH                               | [3]       |
| Bi <sub>2</sub> O <sub>3</sub> /NCDs                          | Unique structure           | 1046 F g <sup>-1</sup>                                   | 1 A g <sup>-1</sup>    | 3 M KOH                               | [4]       |
| Bi-Bi <sub>2</sub> O <sub>3</sub> /CNT                        | Nanoparticles/Nanowires    | 850 F g <sup>-1</sup>                                    | 1 A g <sup>-1</sup>    | 6 M KOH                               | [5]       |
| Bi <sub>2</sub> O <sub>3</sub> /NF                            | Nanosheet-like             | 138.3 mA h g <sup>-1</sup>                               | 10 mA cm <sup>-2</sup> | 3 M KOH                               | [6]       |
| Bi-Bi <sub>2</sub> O <sub>3</sub>                             | Nanosheets                 | 252.5 mAh g <sup>-1</sup>                                | 2 A g <sup>-1</sup>    | 0.5 M Na <sub>2</sub> SO <sub>4</sub> | [7]       |
| (Ni <sub>1-x</sub> Co <sub>x</sub> )Se <sub>2</sub> /NiCo-LDH | Core/Shell Nanospheres     | 170 mAh g <sup>-1</sup>                                  | 2 A g <sup>-1</sup>    | 3 M KOH                               | [8]       |
| Ni <sub>3</sub> S <sub>2</sub> @Ni(OH) <sub>2</sub> -G        | Sandwich                   | 2258 F g <sup>-1</sup>                                   | 1 A g <sup>-1</sup>    | 3 M KOH                               | [9]       |
| NiCo-LDH                                                      | Thiourea additive          | 1198 F <sup>-1</sup>                                     | 1 A g <sup>-1</sup>    | 2 M KOH                               | [10]      |
| CC/NiCoP@NiCo-LDH                                             | Core/shell heterostructure | 1951 F g <sup>-1</sup>                                   | 1 mA cm <sup>-2</sup>  | 6 M KOH                               | [11]      |
| CoVS <sub>x</sub> @NiCo-LDH                                   | Nanosheet/Nanosheet        | 306.0 mAh g <sup>-1</sup><br>2448.0 F g <sup>-1</sup>    | 1 A g <sup>-1</sup>    | 6 M KOH                               | This work |

- [1] G. Zan, T. Wu, P. Hu, Y. Zhou, S. Zhao, S. Xu, J. Chen, Y. Cui, Q. Wu, An approaching-theoretical-capacity anode material for aqueous battery: Hollow hexagonal prism Bi<sub>2</sub>O<sub>3</sub> assembled by nanoparticles, *Energy Storage Mater.* 28 (2020) 82-90. doi:10.1016/j.ensm.2020.02.027.
- [2] Y. Liu, M. Li, G. Wang, L. Dang, F. Li, M.E. Pam, H. Zhang, J. Han, H.Y. Yang, Bismuth Oxide Selenium/Graphene Oxide Composites: Toward High-Performance Electrodes for Aqueous Alkaline Battery, *Energy Environ. Mater.* (2020) 1-9. doi:10.1002/eem2.12130.
- [3] Y. Qiu, H. Fan, X. Chang, H. Dang, Q. Luo, Z. Cheng, Novel ultrathin Bi<sub>2</sub>O<sub>3</sub> nanowires for supercapacitor electrode materials with high performance, *Appl. Surf. Sci.* 434 (2018) 16-20.



- doi:10.1016/j.apsusc.2017.10.171.
- [4] Z. Ji, W. Dai, S. Zhang, G. Wang, X. Shen, K. Liu, G. Zhu, L. Kong, J. Zhu, Bismuth oxide/nitrogen-doped carbon dots hollow and porous hierarchitectures for high-performance asymmetric supercapacitors, *Adv. Powder Technol.* 31 (2020) 632-638. doi:10.1016/j.apt.2019.11.018.
- [5] H. Wu, J. Guo, D. Yang, Facile autoreduction synthesis of core-shell Bi-Bi<sub>2</sub>O<sub>3</sub>/CNT with 3-dimensional neural network structure for high-rate performance supercapacitor, *J. Mater. Sci. Technol.* 47 (2020) 169-176. doi:10.1016/j.jmst.2020.02.007.
- [6] Y. Huang, L. Quan, T. Liu, Q. Chen, D. Cai, H. Zhan, Construction of MOF-derived hollow Ni-Zn-Co-S nanoword arrays as binder-free electrodes for asymmetric supercapacitors with high energy density, *Nanoscale.* 10 (2018) 14171-14181. doi:10.1039/c8nr03919d.
- [7] T. Qin, D. Wang, X. Zhang, Y. Wang, N.E. Drewett, W. Zhang, T. Dong, T. Li, Z. Wang, T. Deng, Z. Pan, N. Yue, R. Yang, K. Huang, S. Feng, R. Huang, W. Zheng, Unlocking the Optimal Aqueous  $\delta$ -Bi<sub>2</sub>O<sub>3</sub> Anode via Unifying Octahedrally Liberated Bi-Atoms and Spilled Nano-Bi Exsolution, *Energy Storage Mater.* 36 (2021) 376-386. doi:10.1016/j.ensm.2021.01.013.
- [8] X. Li, H. Wu, C. Guan, A.M. Elshahawy, Y. Dong, S.J. Pennycook, J. Wang, (Ni,Co)Se<sub>2</sub>/NiCo-LDH Core/Shell Structural Electrode with the Cactus-Like (Ni,Co)Se<sub>2</sub> Core for Asymmetric Supercapacitors, *Small.* 15 (2019) 1-10. doi:10.1002/smll.201803895.
- [9] X. Wang, J. Hu, Y. Su, J. Hao, F. Liu, S. Han, J. An, J. Lian, Ni Foam-Ni<sub>3</sub>S<sub>2</sub>@Ni(OH)<sub>2</sub>-Graphene Sandwich Structure Electrode Materials: Facile Synthesis and High Supercapacitor Performance, *Chem.-A Eur. J.* 23 (2017) 4128-4136. doi:10.1002/chem.201605212.
- [10] Y. Wang, Z. Yin, G. Yan, Z. Wang, X. Li, H. Guo, J. Wang, New insight into the

- electrodeposition of NiCo layered double hydroxide and its capacitive evaluation, *Electrochim. Acta.* 336 (2020) 135734. doi:10.1016/j.electacta.2020.135734.
- [11] X. Gao, Y. Zhao, K. Dai, J. Wang, B. Zhang, X. Shen, NiCoP nanowire@NiCo-layered double hydroxides nanosheet heterostructure for flexible asymmetric supercapacitors, *Chem. Eng. J.* 384 (2020) 123373. doi:10.1016/j.cej.2019.123373.
